# Supplementary material
Source: Springer Nature journal article supplement (https://www.springermedizin.de/resource/supplementary/13046_2008_111_MOESM4_ESM.pdf/9661652)

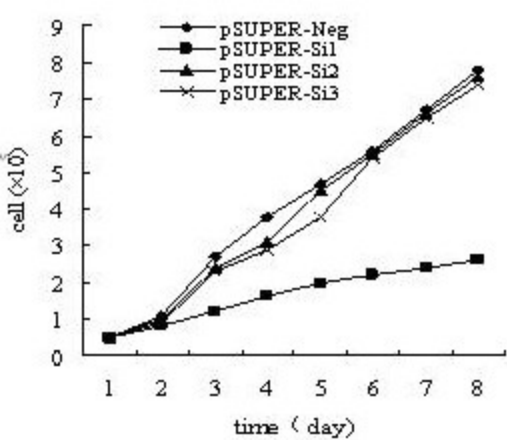

Supplement: MOESM4 [file 9661652]
